# Supplementary material for: Highly porous metal–organic framework sustained with 12-connected nanoscopic octahedra
Source: Royal Society of Chemistry journal article supplement (doi:10.1039/c2dt32479b), 2012-10-25
Supplement: c2dt32479b1.pdf [file c2dt32479b1.pdf]

## Supporting information

### Highly porous metal-organic framework sustained with 12-connected nanoscopic octahedra

Weigang Lu<sup>a</sup>, Daqiang Yuan<sup>\*b</sup>, Tegan A. Makal<sup>a</sup>, Zhangwen Wei<sup>a</sup>, Jian-Rong Li<sup>a</sup>, and  
Hong-Cai Zhou<sup>\*a</sup>

*Department of Chemistry, Texas A&M University, College Station, TX 77843, USA*

*Fujian Institute of Research on the Structure of Matter, Chinese Academy of Sciences, Fuzhou,  
350002, P.R.China.*

e-mail: [zhou@mail.chem.tamu.edu](mailto:zhou@mail.chem.tamu.edu)  
[ydq@fjirsm.ac.cn](mailto:ydq@fjirsm.ac.cn)

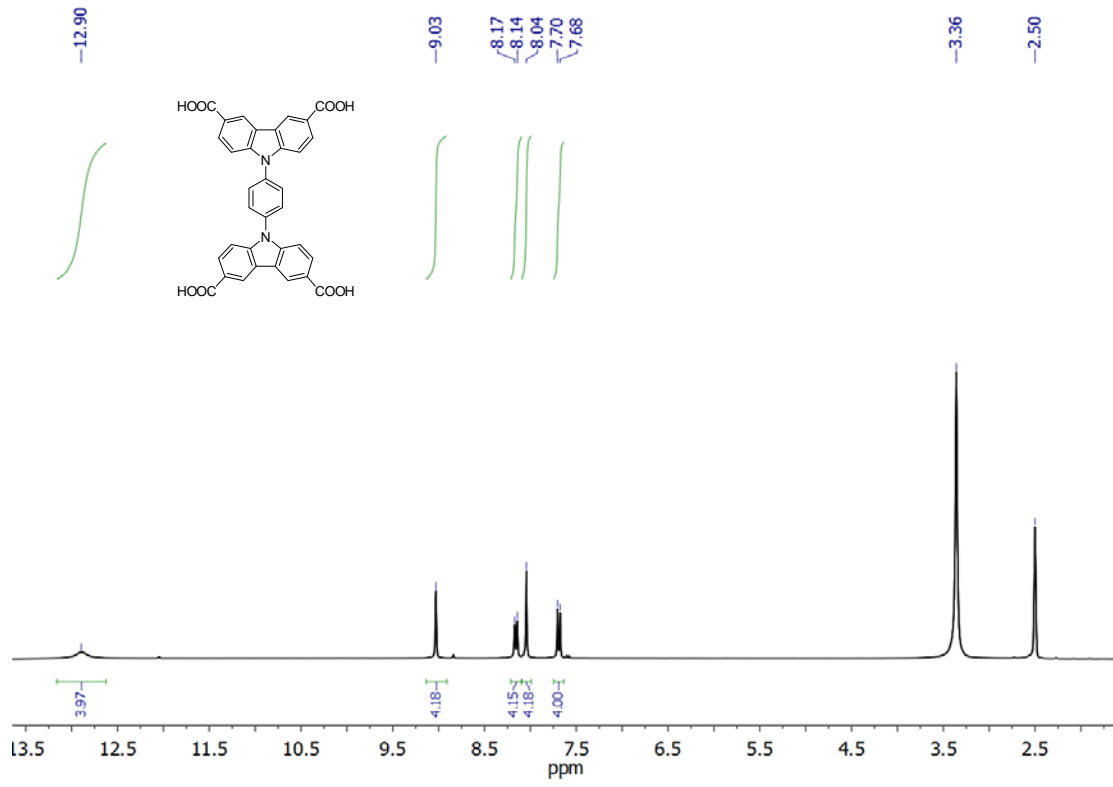

Fig. S1  $^1H$ -NMR of  $H_4pbcd$

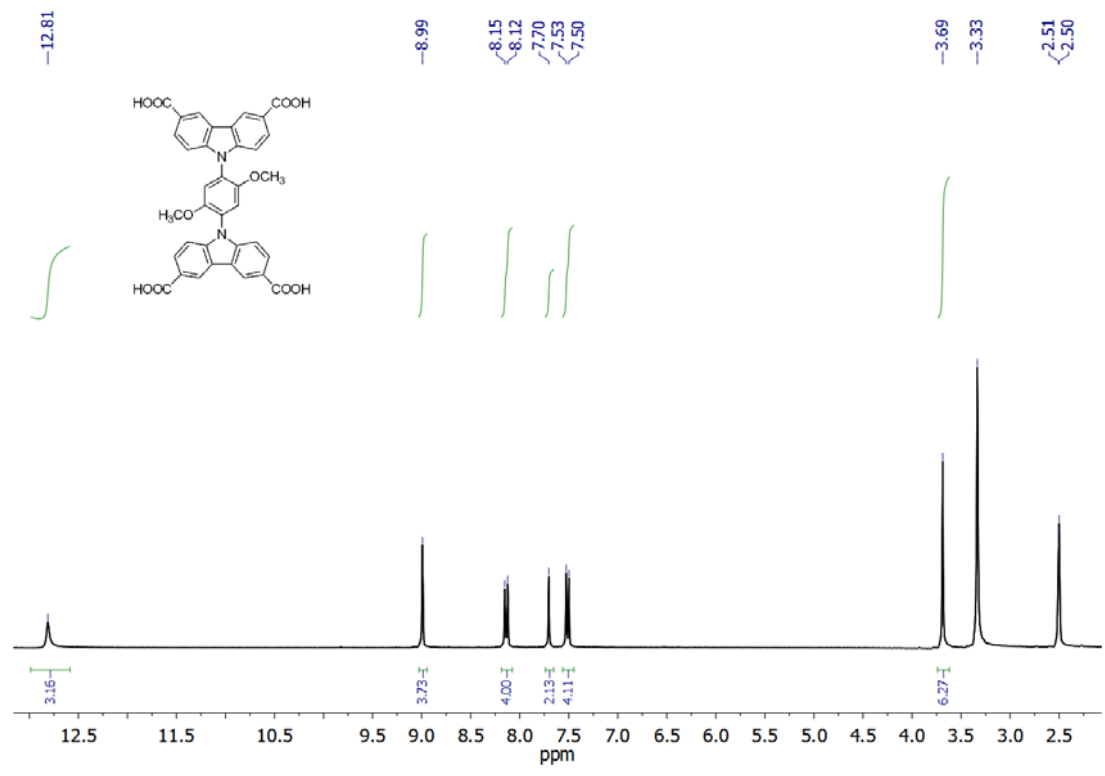

Fig. S2  $^1H$ -NMR of  $H_4dpbcd$

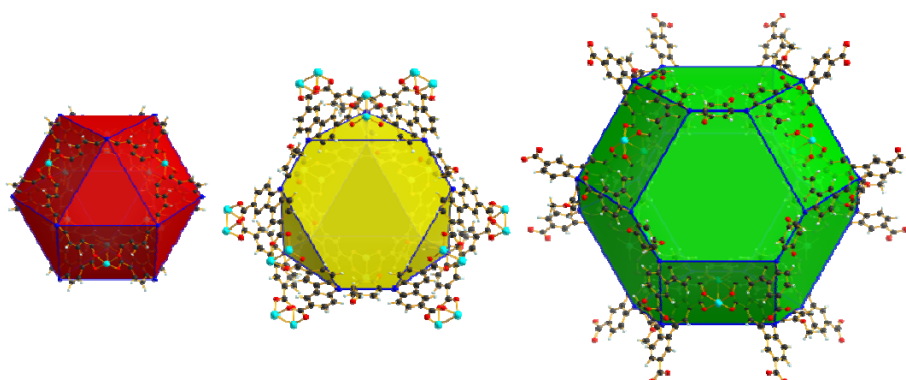

**Fig. S3** Three type of cages in PCN-82

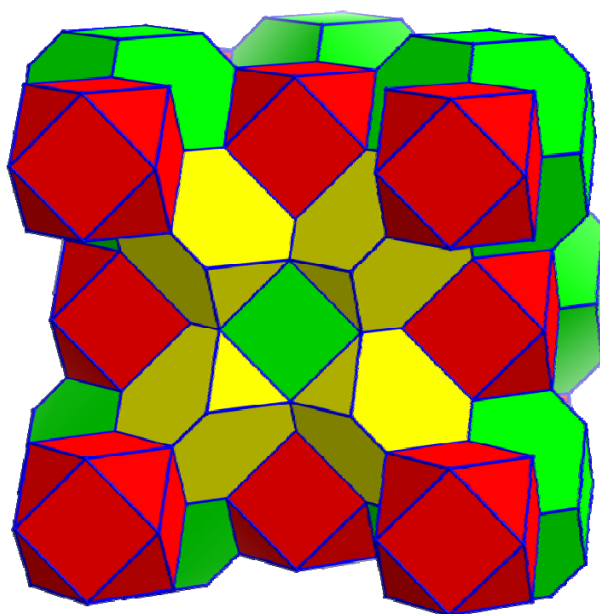

**Fig. S4** Polyhedron packing in PCN-82

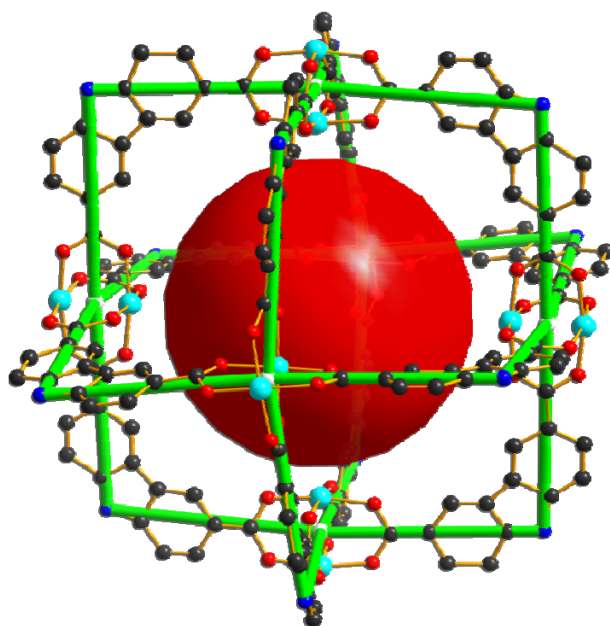

Fig. S5 Cage A in PCN-81

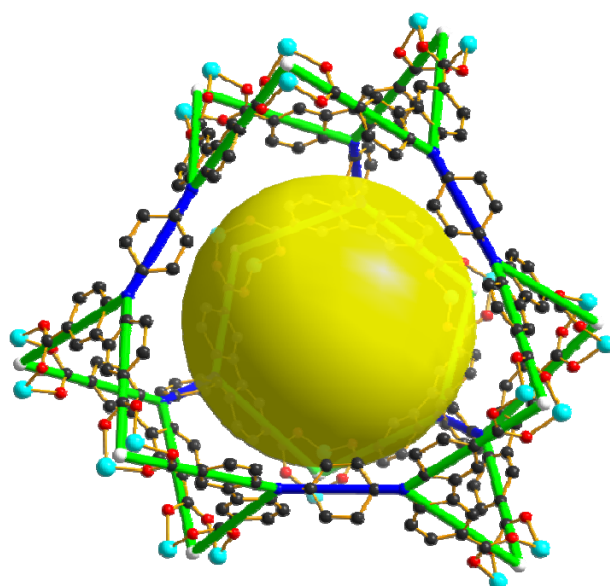

Fig. S6 Cage B in PCN-81

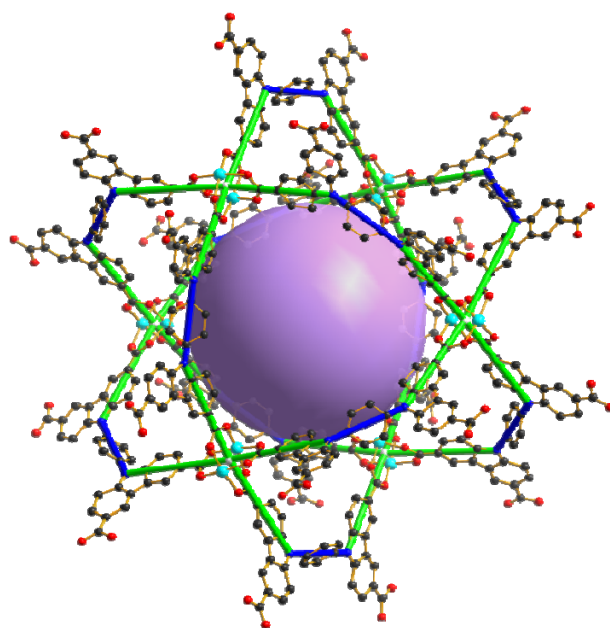

Fig. S7 Cage C in PCN-81

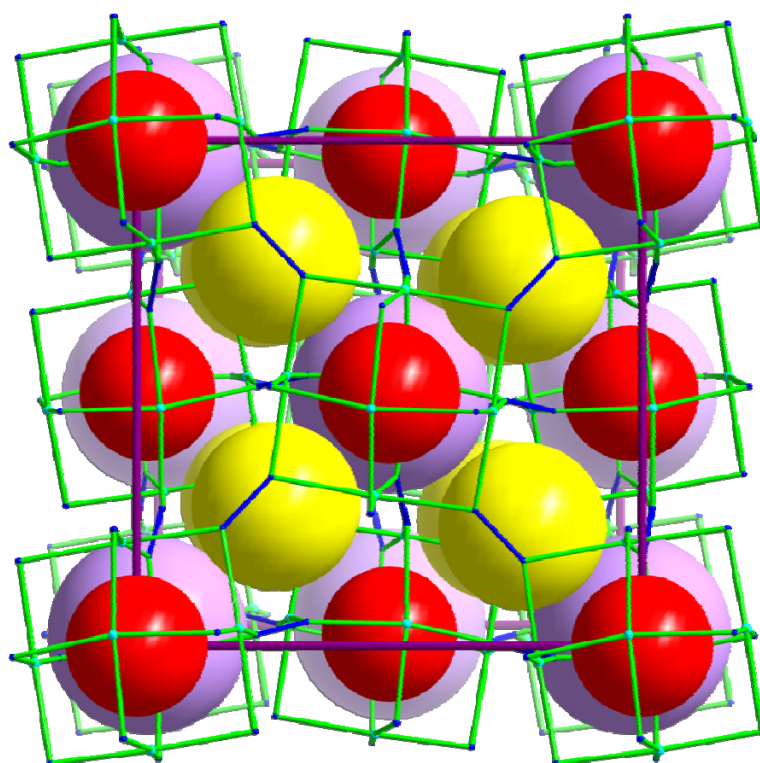

Fig. S8 Cage packing in PCN-81

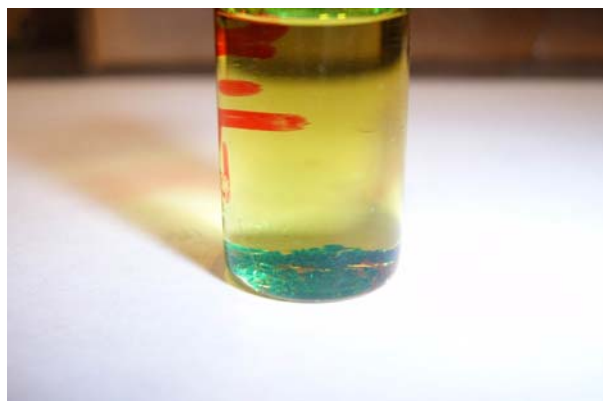

**Fig. S9** Fresh sample of PCN-82

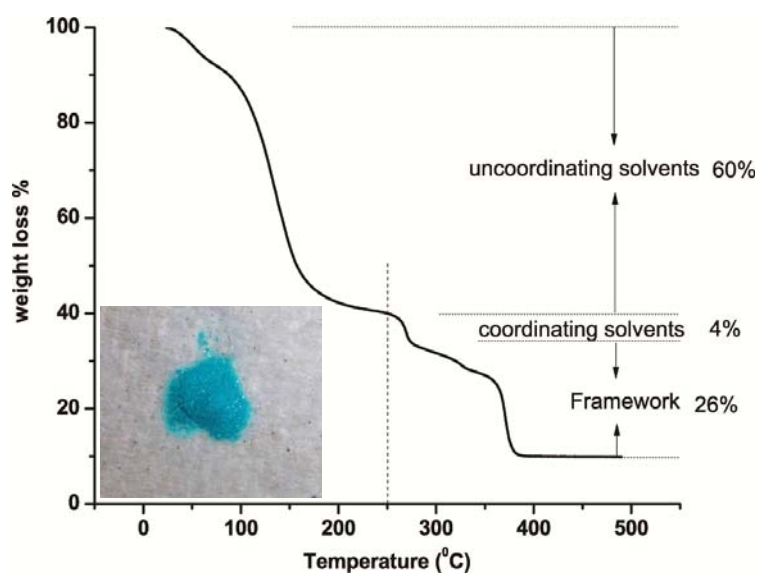

**Fig. S10** TGA of PCN-82, inset picture shows sample dried on paper towel for a while before loaded for TG analysis

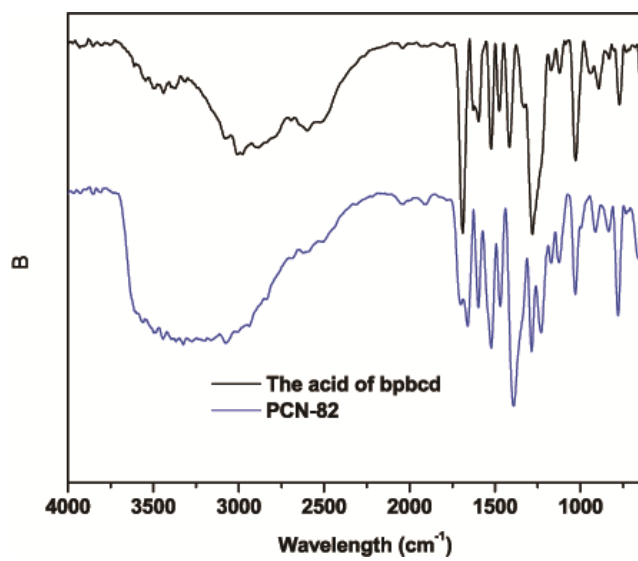

Fig. S11 Infrared spectroscopy of H<sub>4</sub>bpbcd and PCN-82

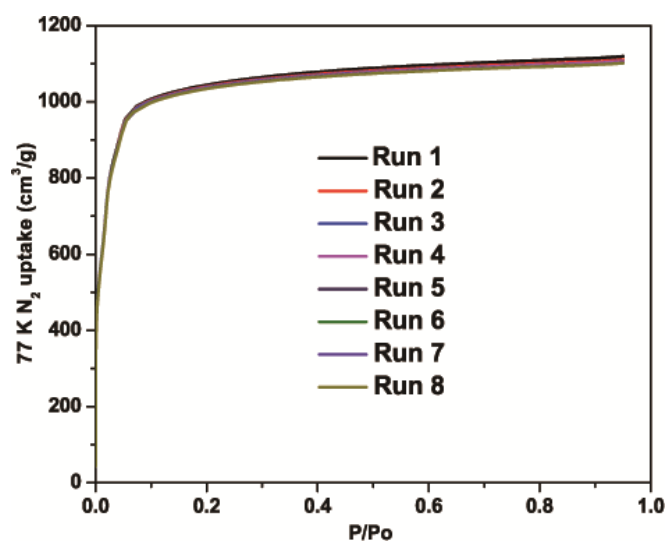

Fig. S12 N<sub>2</sub> adsorption isotherms of freeze-dried PCN-82 in 8 consecutive cycles

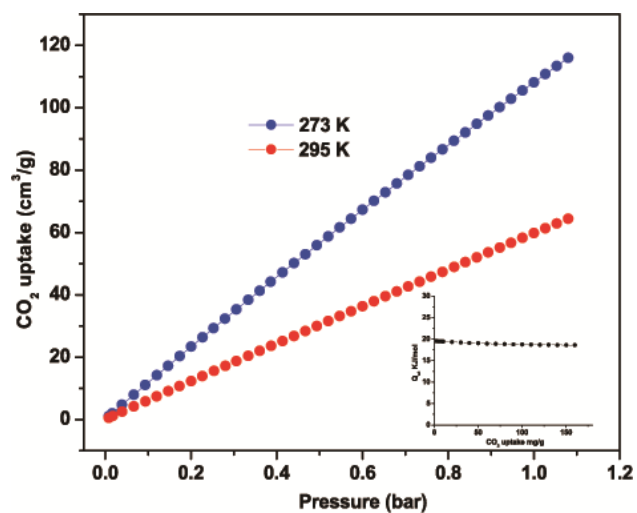

Fig. S13 CO<sub>2</sub> adsorption isotherms of freeze-dried PCN-82 at 273 K and 295 K, inset is calculated heat of adsorption

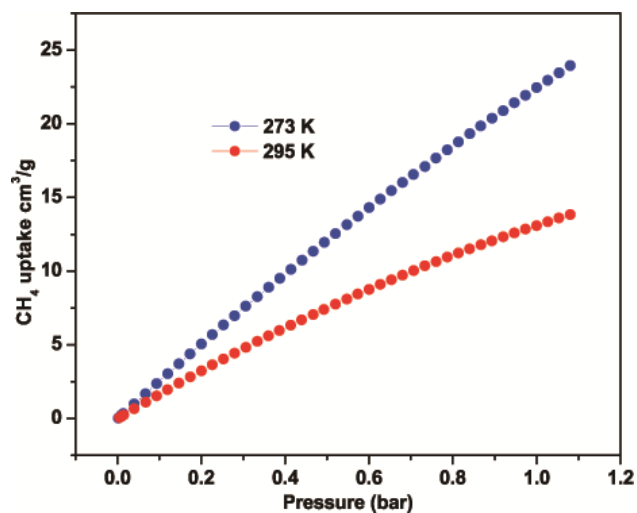

Fig. S14 CH<sub>4</sub> adsorption isotherms of freeze-dried PCN-82 at 273 K and 295 K



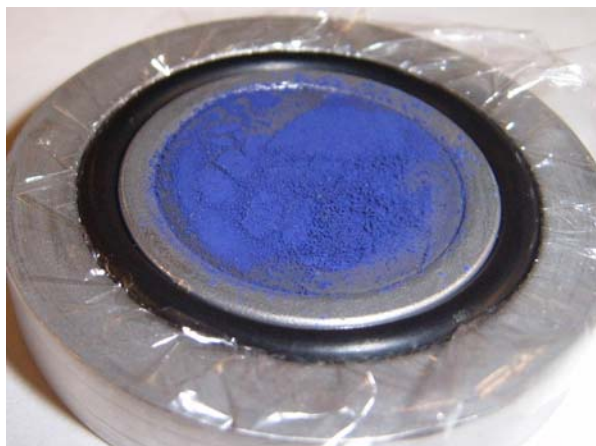

**Fig. S15** PXR measurement setup for the activated PCN-82
